# Supplementary material
Source: PubMed Central journal article supplement (PMC5334791)
Supplement: NIHMS71051-supplement-Supplementary_Material.pdf [file NIHMS71051-supplement-Supplementary_Material.pdf]

**a** Step 1 - Amplification of PCR products from LentiGuide-Puro

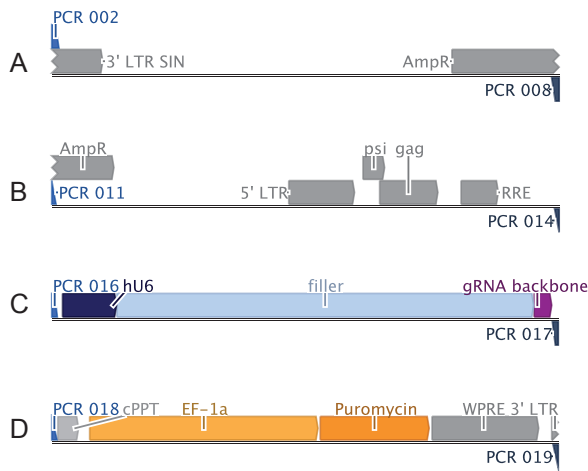

| Product | PCR primers                                                                       |
|---------|-----------------------------------------------------------------------------------|
| A       | FWD 002 pCTGCTTTTTGCTTGACTGGGTCTCTCTG<br>REV 008 pCCGGGAAGCTAGAGTAAGTAGTTCGCCAG   |
| B       | FWD 011 pCAACAATTAATAGACTGGATGGAGCGG<br>REV 014 pTCTGAAACGATAATGGTGAATATCCCTGC    |
| C       | FWD 016 pTTCACCATTATCGTTTCAGACCCACC<br>REV 017 pTGTCTCAAGATCTAGTTACGCCAAGC        |
| D       | FWD 018 pATCTTGAGACAAATGGCAGTATTCATCCAC<br>REV 019 pATCTTGTCTTCGTTGGGAGTGAATTAGCC |

**b** Step 2 - Assembly of CROPseq-Guide-Puro from PCR products via the ligase cycling reaction (LCR)

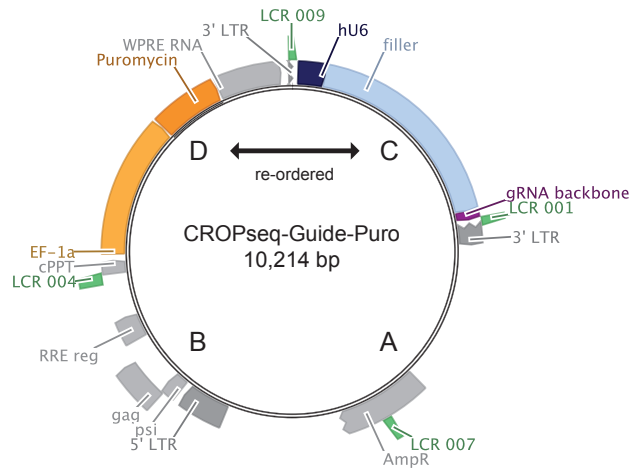

Bridge oligos directing the LCR assembly (5' > 3')

|         |                                                                                                        |
|---------|--------------------------------------------------------------------------------------------------------|
| LCR 001 | GGTGCTTTTTTAAGCTGGCGTAAGTACTGATCTTGAGACACTGCTTTTTGCTTGACTGGGTCTCTCGTTAGAC                              |
| LCR 004 | CTTCTATAGTGAATAGAGTTAGGCCAGGATATCACCATTATCGTTTCAGAATCTTGAGACAAATGGCAGTATTC<br>ATCCACAATTTAAAAGAAAAGGGG |
| LCR 007 | AACTATTAACTGGCGAACTACTACTCTAGCTTCCCGGCAACAATTAATAGACTGGATGGAGCGGATAAAGTTGCAG                           |
| LCR 009 | GGAAAGGCTAATTCACCTCCCAACGAAGACAAGATTCACCATTATCGTTTCAGACCCACCTCCCAA                                     |

**c** Validation of gRNA cassette duplication after viral integration

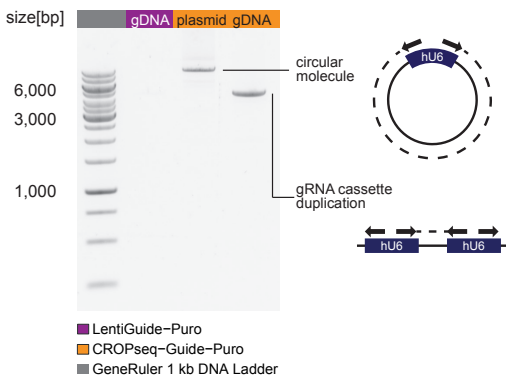

**Supplementary Figure 1**

Cloning and validation of the CROPseq-Guide-Puro plasmid

**a**) As starting point for preparing the CROPseq-Guide-Puro plasmid, we amplified four PCR products (A, B, C, and D) from the LentiGuide-Puro plasmid with the indicated primer pairs. **b**) CROPseq-Guide-Puro was constructed from these four amplicons using the ligase cycling reaction (LCR). The assembly was directed by four overlapping bridge oligonucleotides to flip the order of parts C and D. This rearrangement places the hU6-gRNA cassette into the 3' LTR, downstream of the EF-1a puromycin marker. **c**) To validate the duplication of the hU6-gRNA cassette during lentiviral integration, we performed PCRs with primers that bind to the hU6 promoter but face in opposite directions. Productive amplification can occur only when amplifying from a circular plasmid or following duplication of the cassette during viral integration. As templates, we used gDNA from LentiGuide-Puro transduced cells (lane 1, resulting in no amplification), a plasmid preparation of CROPseq-Guide-Puro (lane 2), or gDNA from CROPseq-Guide-Puro transduced cells (lane 3).

**a** T7 endonuclease assays for bulk as well as clonally expanded HEK293T cells

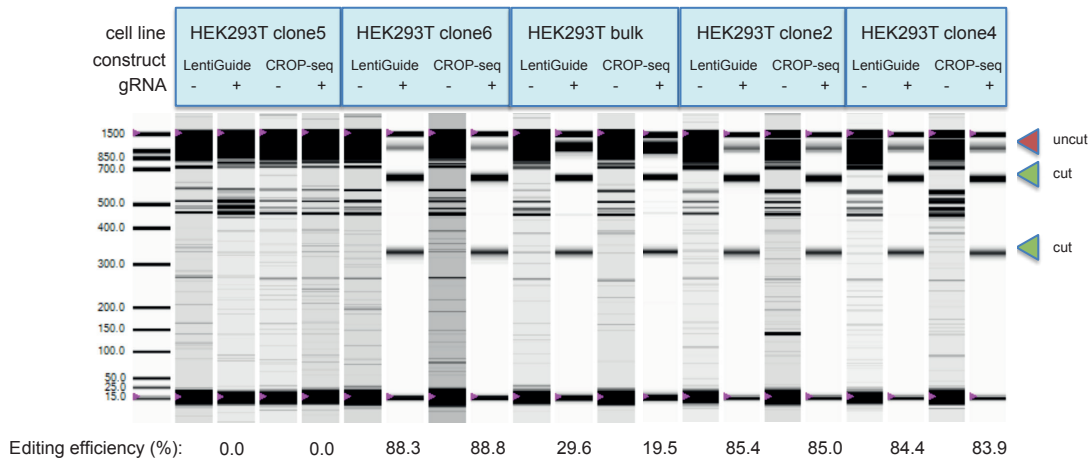

**b** Summary table of all T7 endonuclease assays performed

| sample_ID | cell_line   | viral_construct    | gene   | undigested [nM] | digested 1 [nM] | digested 2 [nM] | editing_efficiency[%] |
|-----------|-------------|--------------------|--------|-----------------|-----------------|-----------------|-----------------------|
| 1         | HEK clone5  | LentiGuide-Puro    | MBD1   | 9.26            | 0               | 0               | 0.0                   |
| 2         | HEK clone5  | CROPseq-Guide-Puro | MBD1   | 9.52            | 0               | 0               | 0.0                   |
| 3         | HEK clone6  | LentiGuide-Puro    | MBD1   | 1.01            | 7.26            | 8.02            | 88.3                  |
| 4         | HEK clone6  | CROPseq-Guide-Puro | MBD1   | 1.07            | 8.05            | 8.98            | 88.8                  |
| 5         | HEK bulk    | LentiGuide-Puro    | MBD1   | 7.25            | 2.85            | 3.24            | 29.6                  |
| 6         | HEK bulk    | CROPseq-Guide-Puro | MBD1   | 7.79            | 1.85            | 1.93            | 19.5                  |
| 7         | HEK clone2  | LentiGuide-Puro    | MBD1   | 1.44            | 8.22            | 8.68            | 85.4                  |
| 8         | HEK clone2  | CROPseq-Guide-Puro | MBD1   | 1.54            | 8.36            | 9.16            | 85.0                  |
| 9         | HEK clone4  | LentiGuide-Puro    | MBD1   | 1.58            | 8.3             | 8.76            | 84.4                  |
| 10        | HEK clone4  | CROPseq-Guide-Puro | MBD1   | 1.69            | 8.55            | 9.09            | 83.9                  |
| 11        | HEK clone5  | LentiGuide-Puro    | DNMT3B | 10.54           | 0               | 0               | 0.0                   |
| 12        | HEK clone5  | CROPseq-Guide-Puro | DNMT3B | 8.81            | 0               | 0               | 0.0                   |
| 13        | HEK clone6  | LentiGuide-Puro    | DNMT3B | 0.92            | 12.37           | 9.71            | 92.3                  |
| 14        | HEK clone6  | CROPseq-Guide-Puro | DNMT3B | 0.76            | 11.06           | 8.2             | 92.7                  |
| 15        | HEK bulk    | LentiGuide-Puro    | DNMT3B | 6.37            | 2.61            | 2.13            | 27.1                  |
| 16        | HEK bulk    | CROPseq-Guide-Puro | DNMT3B | 6.48            | 2.64            | 2.25            | 27.4                  |
| 17        | HEK clone2  | LentiGuide-Puro    | DNMT3B | 1.24            | 14.26           | 11.64           | 91.3                  |
| 18        | HEK clone2  | CROPseq-Guide-Puro | DNMT3B | 1.17            | 14.25           | 11.2            | 91.6                  |
| 19        | HEK clone4  | LentiGuide-Puro    | DNMT3B | 0.97            | 12.97           | 9.97            | 92.2                  |
| 20        | HEK clone4  | CROPseq-Guide-Puro | DNMT3B | 0.91            | 12.37           | 9.45            | 92.3                  |
| 21        | K562 bulk   | LentiGuide-Puro    | MBD1   | 0.7             | 6.61            | 6.88            | 90.6                  |
| 22        | K562 bulk   | CROPseq-Guide-Puro | MBD1   | 0.63            | 6.31            | 6.12            | 90.8                  |
| 23        | Jurkat bulk | LentiGuide-Puro    | MBD1   | 1.75            | 7.31            | 8.33            | 81.7                  |
| 24        | Jurkat bulk | CROPseq-Guide-Puro | MBD1   | 1.8             | 7.57            | 8.87            | 82.0                  |
| 25        | KBM7 bulk   | LentiGuide-Puro    | MBD1   | 0.98            | 6.89            | 7.32            | 87.9                  |
| 26        | KBM7 bulk   | CROPseq-Guide-Puro | MBD1   | 2.55            | 11.7            | 10.72           | 81.5                  |
| 27        | K562 bulk   | LentiGuide-Puro    | DNMT3B | 0.89            | 10.38           | 8.65            | 91.4                  |
| 28        | K562 bulk   | CROPseq-Guide-Puro | DNMT3B | 0.83            | 10.59           | 8.54            | 92.0                  |
| 29        | Jurkat bulk | LentiGuide-Puro    | DNMT3B | 1.24            | 11.66           | 9.75            | 89.6                  |
| 30        | Jurkat bulk | CROPseq-Guide-Puro | DNMT3B | 1.86            | 10.63           | 9.53            | 84.4                  |
| 31        | KBM7 bulk   | LentiGuide-Puro    | DNMT3B | 1.65            | 6.84            | 6.4             | 80.0                  |
| 32        | KBM7 bulk   | CROPseq-Guide-Puro | DNMT3B | 2.32            | 8.34            | 7.4             | 77.2                  |

**Supplementary Figure 2**

Genome editing efficiencies of LentiGuide-Puro and CROPseq-Guide-Puro based on the T7 endonuclease assay

**a**) Clonally expanded HEK293T cell lines as well as a HEK293T bulk population were transduced with LentiGuide-Puro (LentiGuide) or CROPseq-Guide-Puro (CROP-seq) vectors containing a gRNA targeting the MBD1 locus (+) or targeting a different locus (-). Genome editing efficiencies for MBD1 were measured using the T7 endonuclease assay, which indicated highly similar performance between the two vectors. HEK293T clone 5 did not show any genome editing and was not used for further experiments. **b**) Table summarizing genome editing efficiencies for four cell lines (HEK293T, K562, Jurkat, KBM7) and two gRNAs (MBD1, DNMT3B).

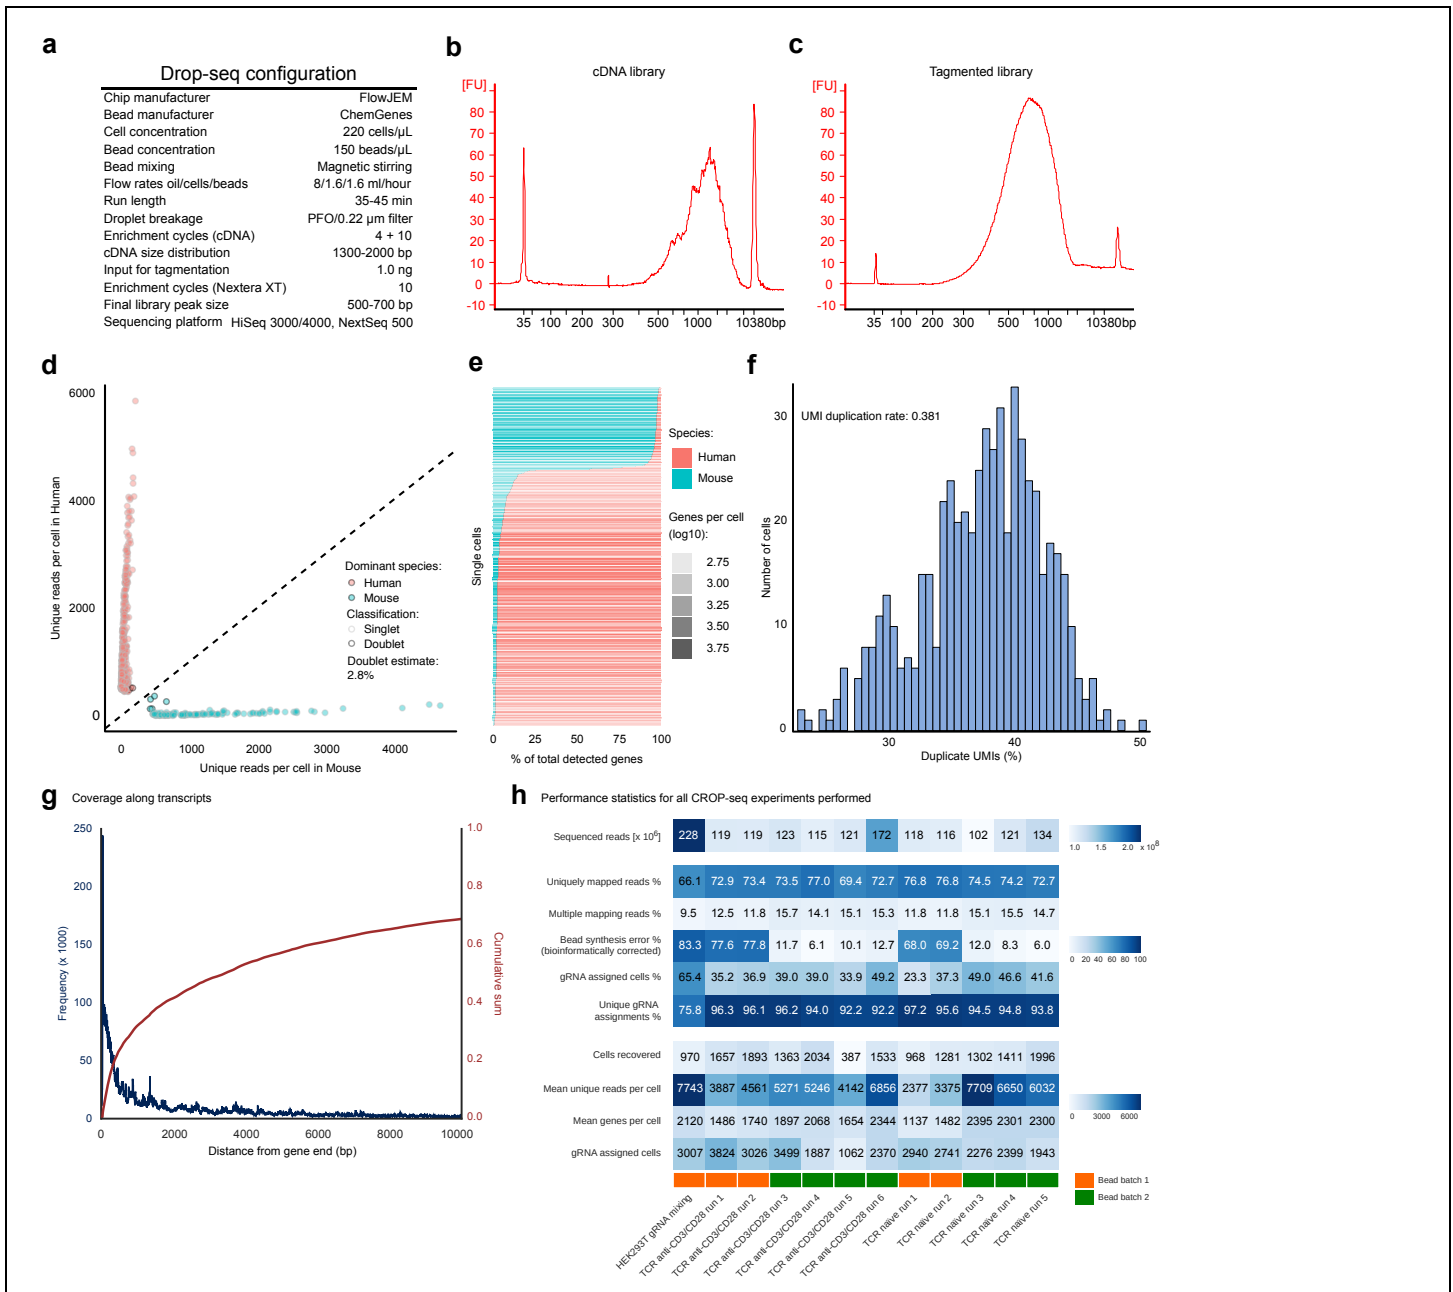

### Supplementary Figure 3

#### Configuration and validation of the droplet-based assay for single-cell transcriptome profiling

**a**) Setup of the Drop-seq workflow used as part of CROP-seq. **b**) Bioanalyzer trace of a typical cDNA library prepared with CROP-seq. **c**) Electropherogram of a sequencing-ready CROP-seq library after tagmentation. **d**) Doublet estimates based on a HEK293T (human) / 3T3 (mouse) mixing experiment across all detected cells and transcripts (without filtering). **e**) Percent of detected genes aligning to the human and mouse transcriptomes (filtered for cells with more than 500 detected genes). **f**) PCR duplication rates based on unique molecular identifiers (UMIs) in the HEK293T (human) / 3T3 (mouse) mixing experiment. **g**) Distribution of the distance of read mapping positions to the 3' end of gene models (blue line) and their cumulative sum (red line). **h**) Detailed performance statistics for twelve CROP-seq experiments. Green and orange labels indicate different batches of Drop-seq beads, where batch 1 suffered from production problems affecting the cell barcodes, which have been bioinformatically corrected to improve the data quality of the affected samples.

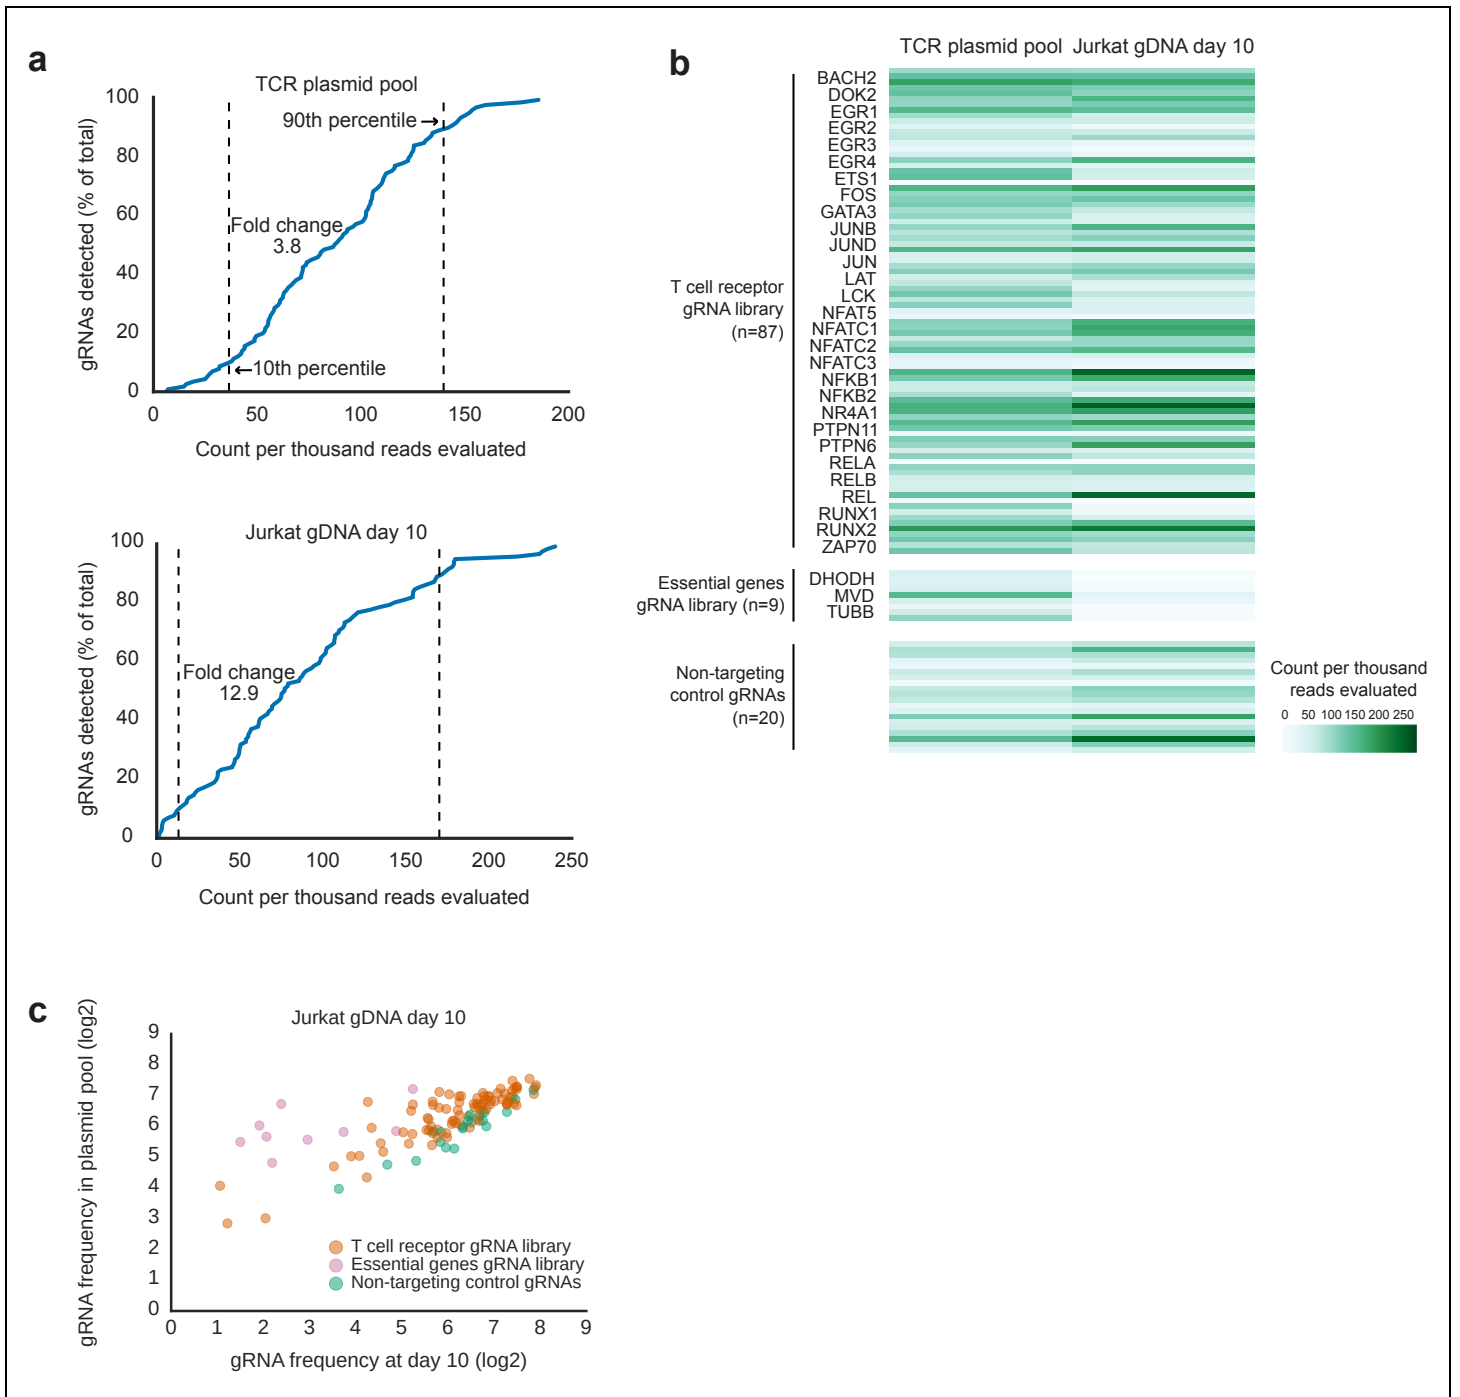

## Supplementary Figure 4

### Validation of the T cell receptor gRNA library and gRNA dynamics

**a**) gRNA representation in the T cell receptor (TCR) gRNA library, assessed by amplicon sequencing of the plasmid pool (top) and the gDNA of Jurkat cells at day 10 post transduction with CROPseq-Guide-Puro (bottom), both displayed as cumulative distribution plots. The fold change between the 10<sup>th</sup> and 90<sup>th</sup> percentile is highlighted as a measure of library imbalance, which expectedly increases upon transduction. **b**) Abundance of each gRNA shown as a heatmap. **c**) Scatterplots of gRNA abundance from amplicon libraries at day 10 versus the original plasmid library. Frequencies of detected gRNAs have been normalized to the evaluated reads in each experiment.

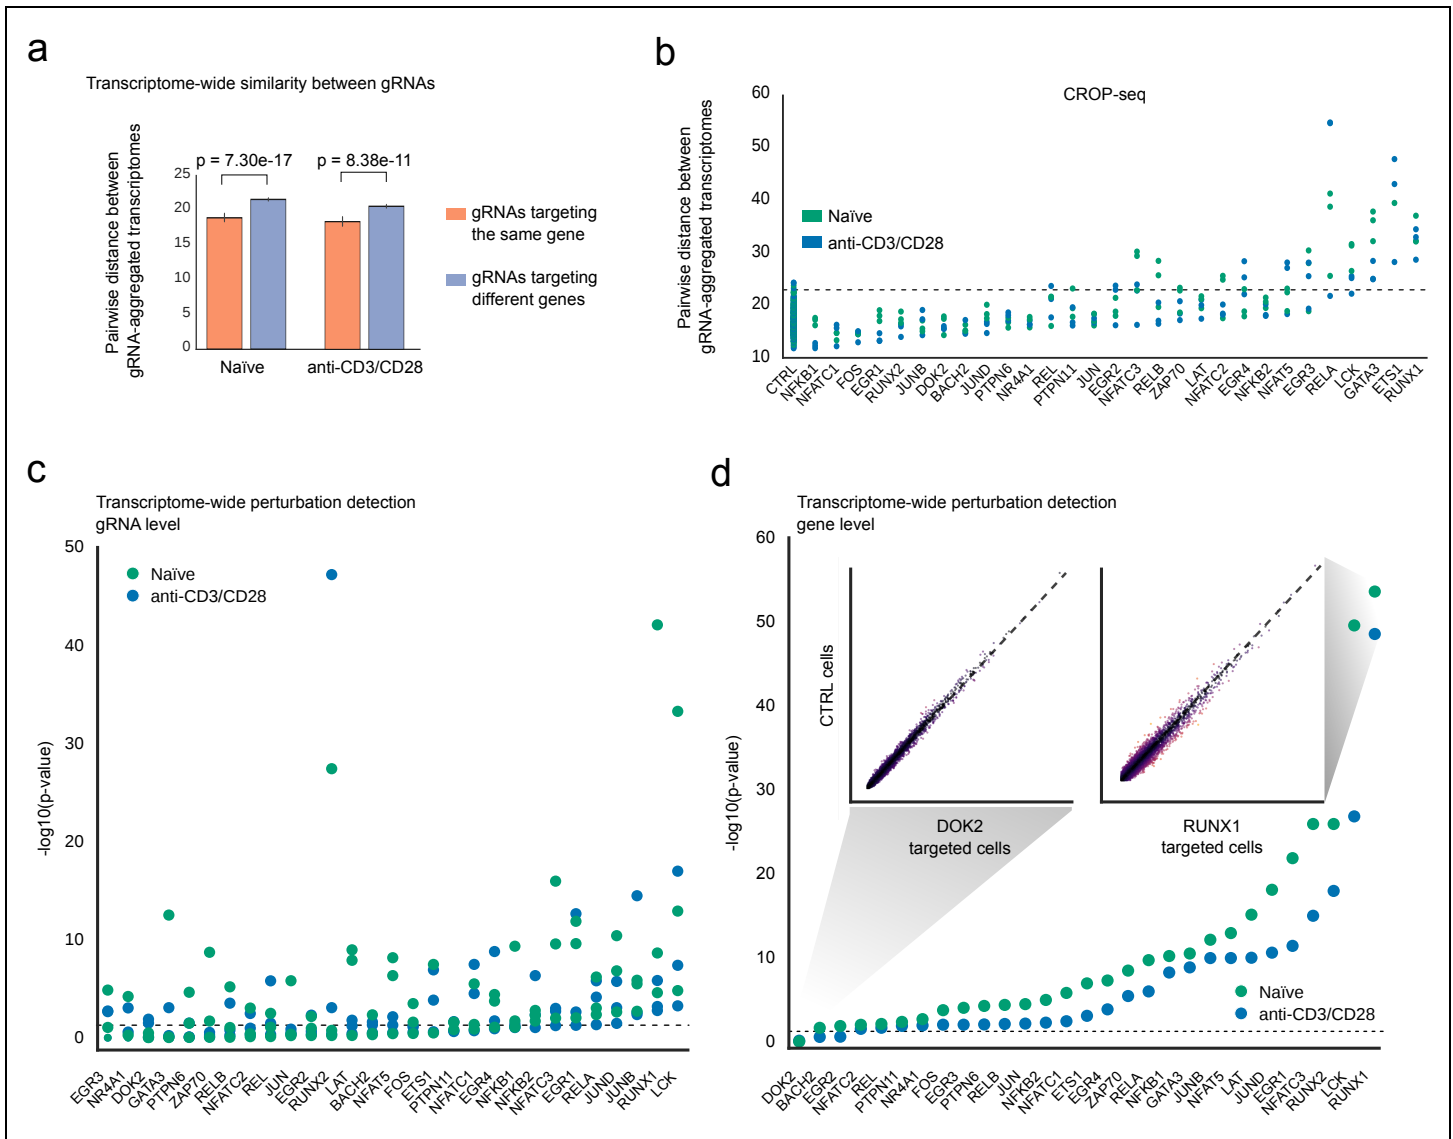

### Supplementary Figure 5

Similarities and differences in the transcriptome response at the gRNA and gene level

**a**) Mean and standard deviation of pairwise distances (L2-norm) between CROP-seq transcriptomes for pairs of gRNAs that target the same gene (orange) or different genes (blue). Statistical significance was assessed with the Mann-Whitney U test. **b**) Pairwise distances as in panel a, shown separately for gRNAs targeting specific genes and for naive as well as anti-CD3/CD28 stimulated cells. The dotted line indicates the 99<sup>th</sup> percentile of the distribution of distances between non-targeting gRNAs. **c**) Statistical significance of the transcriptome-wide effect induced by gRNAs targeting specific genes relative to cells with non-targeting gRNAs (based on the Mann-Whitney U test). The dotted line indicates a p-value of 0.01. **d**) As in panel c, but aggregated at the gene level by combining p-values using Fisher's method. Insets show scatterplots for the expression of two example genes with low (left) and high (right) systematic effects on the transcriptome compared to cells expressing non-targeting control gRNAs in the same stimulation condition (y-axis).



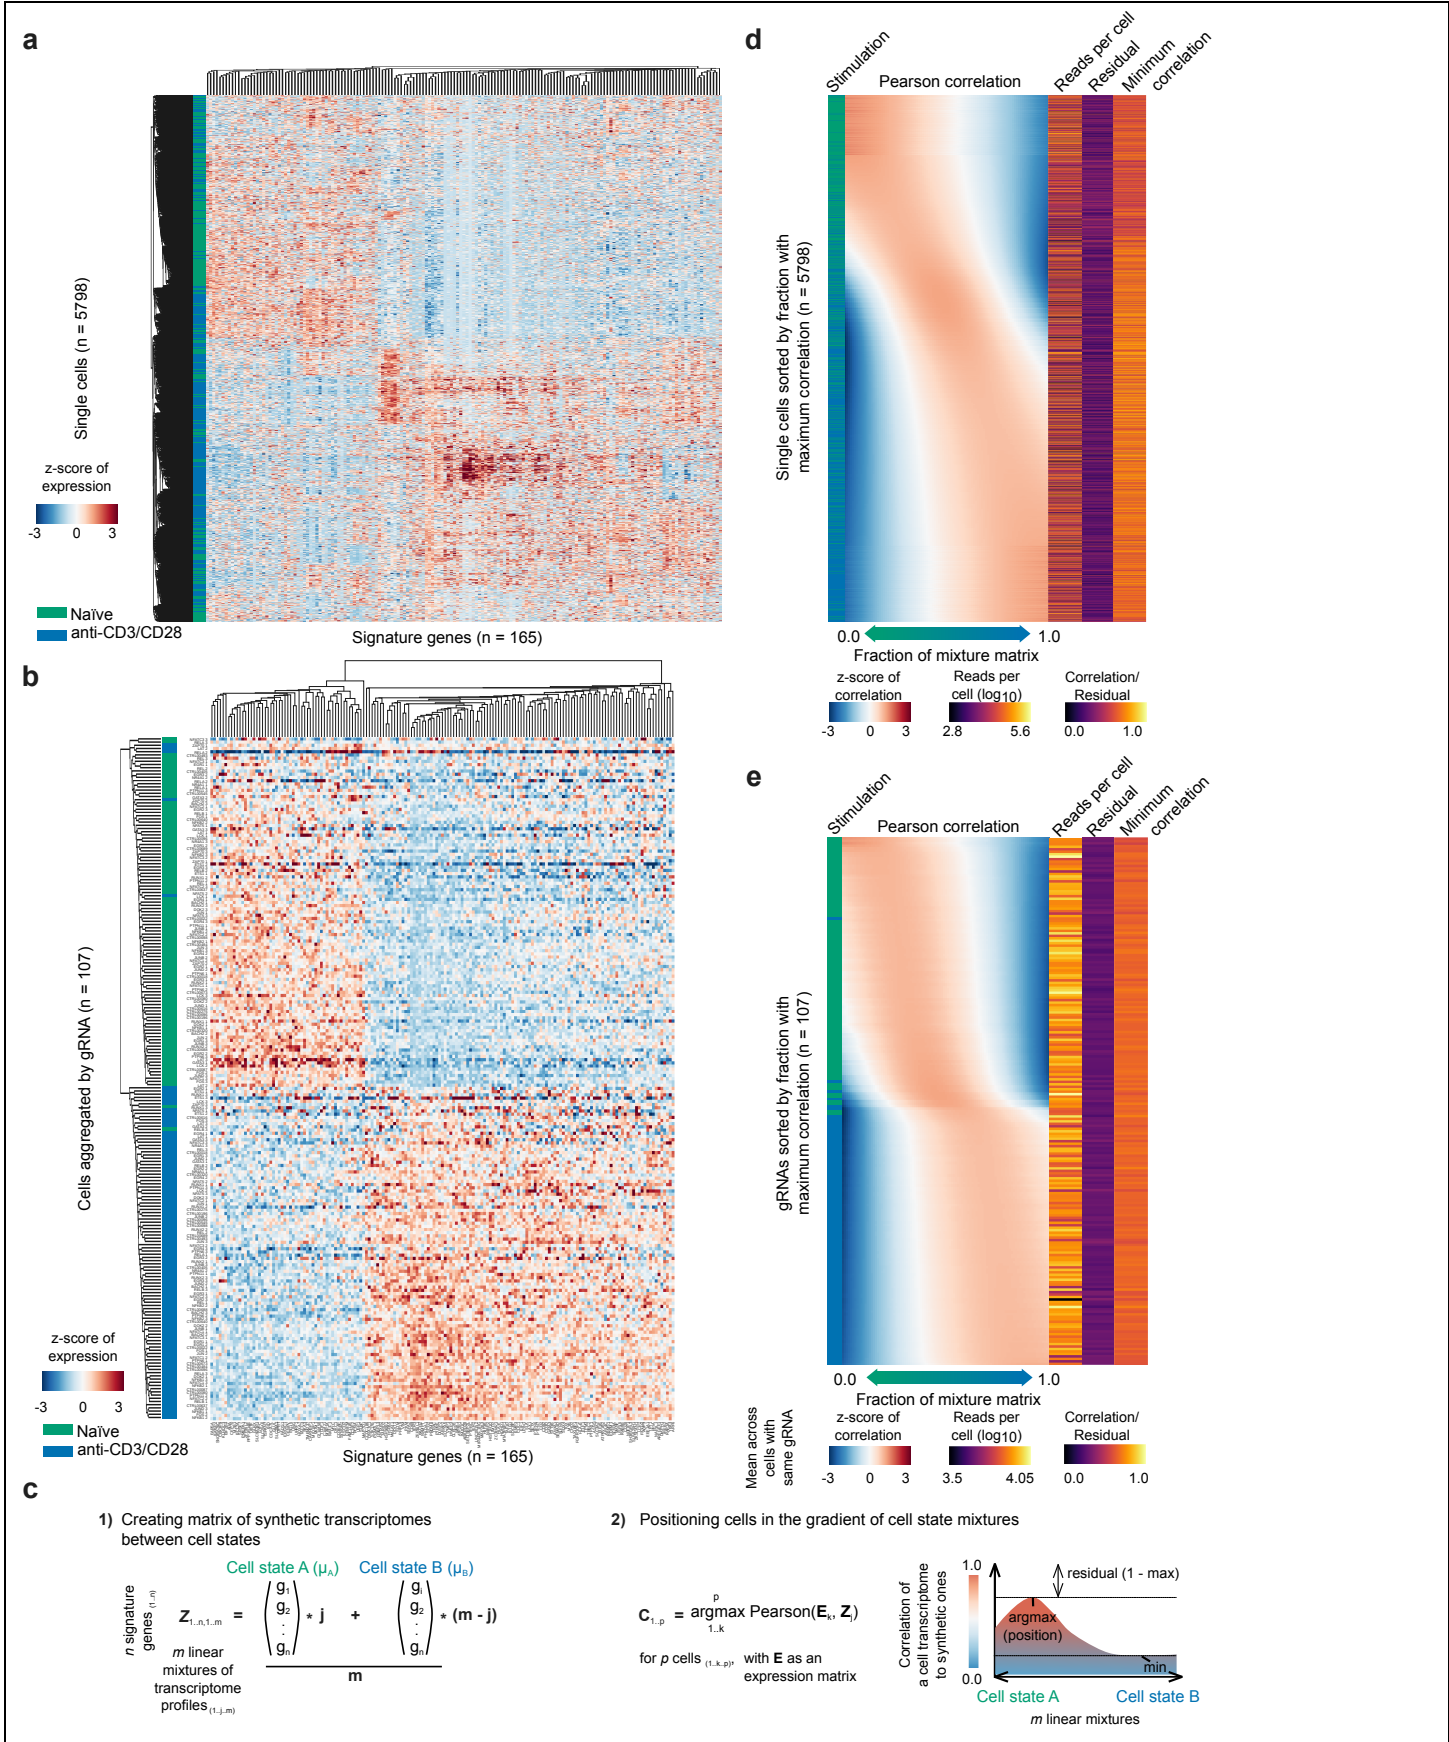

## Supplementary Figure 7

Positioning cells and target genes on a spectrum defined by naïve and stimulated cell states

**a)** Hierarchical clustering of single-cell transcriptomes with unambiguously assigned gRNA ( $n = 5,798$ ) based on all genes included in the TCR activation signature. Clustering for cells and genes used the Pearson correlation, and the z-score of expression is displayed along with the stimulation state for each cell (left column). **b)** Hierarchical clustering of median gene expression values aggregated across cells expressing gRNAs for the same target gene ( $n = 107$ ). **c)** Analytical procedure for assigning each cell to a specific position on a spectrum defined by the CROP-seq transcriptomes of non-targeted cells in the naïve and the anti-CD3/CD28 stimulated cell state. In a first step (left), a matrix of synthetic transcriptome signatures ( $Z$ ) is built by linear combination of the transcriptomes in the two defining cell states ( $\mu_A, \mu_B$ ). In a second step (right), the position of the  $Z$  matrix that shows the maximum Pearson correlation with the transcriptome of the cells ( $E$  matrix) is taken as the cell's position along the spectrum of cell states. **d)** Correlation (row-wise z-score) of single-cell transcriptomes with a matrix comprising synthetic mixtures of transcriptome profiles between the median of non-targeted cells in both conditions (values close to one reflect similarity with anti-CD3/CD28 stimulated cells). Additional data on the transcriptome quality for each cell (unique reads per cell) and the overall correlation performance are shown as columns and reveal no relationship with the inferred position of the corresponding cells. All cells were ordered by the inferred signature value (position with maximum correlation), rather than being clustered as in panel a. **e)** Same as in panel c, but for cells grouped by gRNA target genes.





## Supplementary Figure 8

### Bulk RNA-seq analysis for the arrayed validation screen

**a)** Hierarchical clustering of the median expression of TCR activation signature genes, based on bulk RNA-seq data aggregated across gRNAs for the same target gene. Clustering of rows and columns used the Pearson correlation, and z-scores of expression are shown.

**b)** Correlation (row-wise z-score) of bulk RNA-seq transcriptomes with a matrix comprising synthetic mixtures of transcriptome profiles between the median of non-targeted cells in both conditions (values close to one reflect similarity with anti-CD3/CD28 stimulated cells). Additional metrics are shown as columns (center) and reveal no relationship with the inferred position of the corresponding samples. The effect that perturbing each target gene had on the TCR activation signature based on the bulk RNA-seq data was assessed in comparison to the control group (barplot on the right).

**c)** Correlation (top) of median expression levels based on CROP-seq aggregating across target genes (left) or gRNAs (right) compared to the respective bulk RNA-seq libraries across all TCR activation signature genes. The corresponding number of cells in each group is shown at the bottom. Empty values reflect lack of matching bulk RNA-seq libraries due to failed samples in the bulk RNA-seq.

**d)** Comparison of the signatures inferred from CROP-seq (x-axis) with those derived from bulk RNA-seq data (y-axis) across all shared gRNAs.

**e)** Comparison of the relative impact of each gRNA (left) or target gene (right) on the TCR activation signature relative to the corresponding control for CROP-seq (x-axis) and bulk RNA-seq (y-axis).

**a** Technical and biological validation of CROP-seq via arrayed screening with two complementary read-outs

Differentially expressed surface markers from CROP-seq TCR activation signature and established T-cell activation markers (e.g. PD-1, CD38)

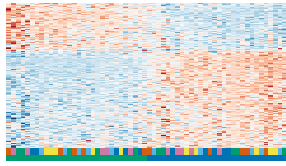

A) Validation by Flow Cytometry

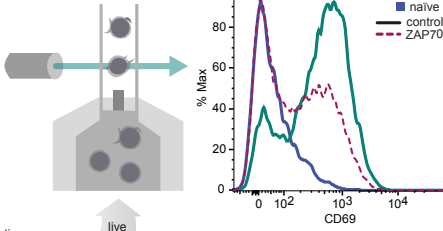

B) Validation by bulk RNA-seq

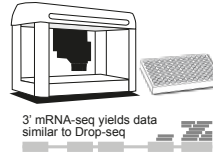

C) Guide RNA validation by Sanger sequencing

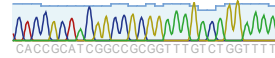

Production of single gRNA cell lines in arrayed format

TCR pathway activation or continued starvation

live cells

RNA

gDNA

20 genes x 2 gRNAs  
8 non-targeting controls  
48 single gRNA cell lines

anti-CD3 stimulated  
anti-CD28  
0% serum  
naive  
0% serum  
3 hrs 7 hrs

**b** Examples of marker gene expression changes detected by flow cytometry

naive control  
+anti-CD3/CD28 control  
+anti-CD3/CD28 knockout

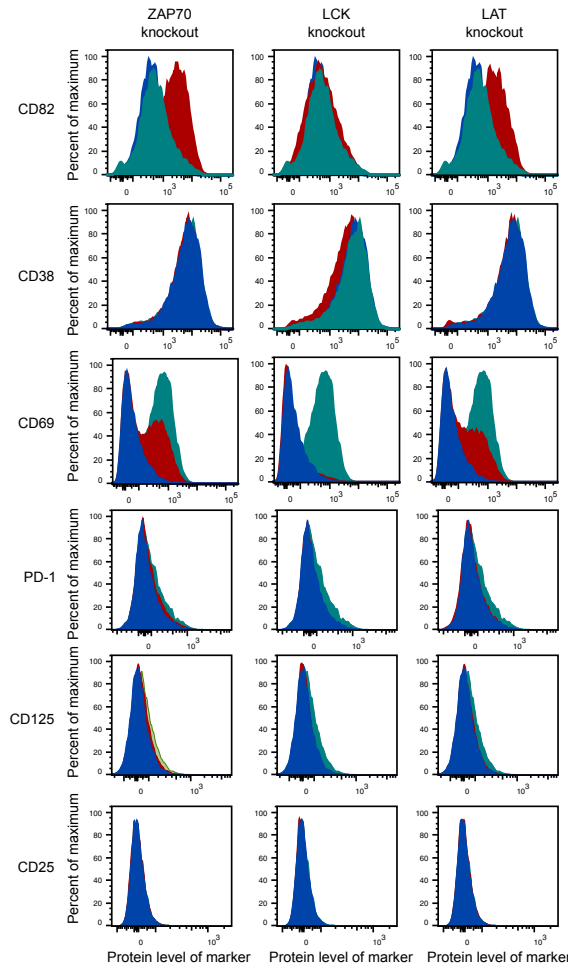

**c** Correlating flow cytometry marker levels with expression values from CROP-seq

48 cell lines (20 genes x 2 gRNAs + 8 controls) and 2 conditions (n = 96)  
data is aggregated by gRNA target gene

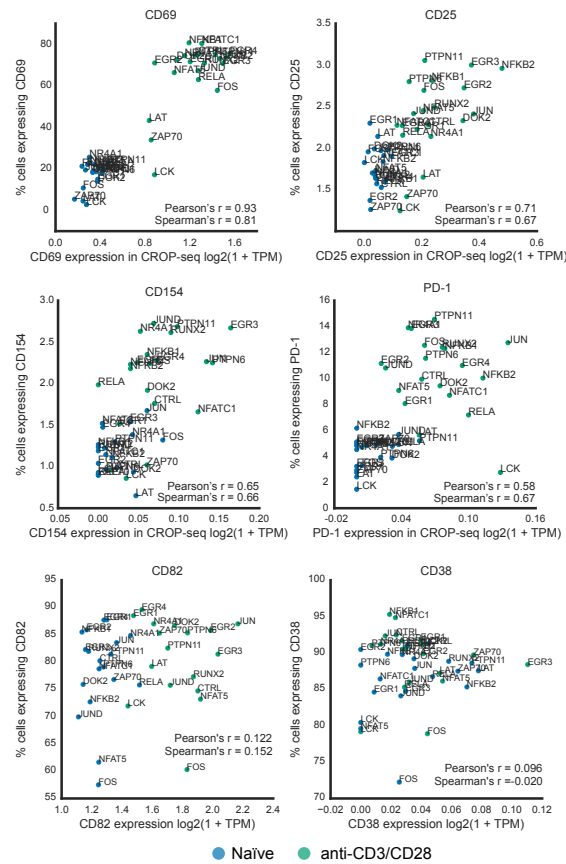

## Supplementary Figure 9

### Flow cytometry analysis for the arrayed validation screen

**a)** Experimental strategy of the arrayed validation screen. For this screen, 48 CROPseq-Guide-Puro constructs were individually cloned, targeting 20 genes with two gRNAs each and including eight non-targeting controls. Lentivirus production and transductions were performed in 96-well plates, and cells were expanded for 10 days under puromycin and blasticidin selection. Cells were then split into two parts, serum starved for three hours, and subjected to either anti-CD3/CD28-stimulation or continuous starvation for another four hours. The resulting cell populations were validated by Sanger sequencing of the corresponding gRNAs. For validation of the CROP-seq signature, bulk RNA-seq was performed using a 3' enrichment protocol, yielding data similar to Drop-seq (n = 87 RNA-seq libraries). As a complementary single-cell and protein-based read-out, flow cytometry (n = 96 samples) was performed for surface markers enriched in the TCR induction signature derived from CROP-seq (CD69, CD82) or previously reported as markers of T cell activation (CD25, CD38, CD154, PD-1). **b)** Examples of marker expression changes for TCR pathway activators identified by CROP-seq (ZAP70, LCK, LAT). **c)** Scatterplots comparing protein levels for TCR induction markers to RNA expression values obtained by CROP-seq.
